# Supplementary material for: SeqSNP-based genic markers reveal genetic architecture and candidate genes for low nitrogen tolerance in tropical maize inbred lines
Source: Front Plant Sci. 2025 May 30;16:1558741. doi: 10.3389/fpls.2025.1558741 (PMC12163039; doi:10.3389/fpls.2025.1558741)
Supplement: Supplementary file 1 [file Table1.xlsx]

## Sheet: Sheet1
Supplementary Table 1: List of previously reported markers used for Targeted SeqSNP selection
Marker Name	Chromosome No	Physical Position	Reference Genome	Alleles	Literature	Trait
PZA00887.1	1	10934676	B73 RefGen_v2	C/G	Almeida et al., 2014	Anthesis-silking interval
PZA03578.1	1	252219631	B73 RefGen_v2	G/A	Almeida et al., 2014	Anthesis-silking interval
PHM1438.34	1	212389447	B73 RefGen_v2	G/A	Almeida et al., 2014; Ribeiro et al., 2018	Anthesis-silking interval; Days to silking
PHM595.30	1	281818347	B73 RefGen_v2	A/C	Almeida et al., 2014	Anthesis-silking interval/Chlorophyll content
PZB01227.6	1	288441343	B73 RefGen_v2	A/T	Almeida et al., 2014; Ribeiro et al., 2018	Chlorophyll content;Days to silking
PHM13191.6	1	291461055	B73 RefGen_v2	G/A	Ribeiro et al., 2018	Days to silking
PZA02467.10	1	196927608	B73 RefGen_v2	C/G	Almeida et al., 2014	Ear Height
PZB01403.1	1	285273845	B73 RefGen_v2	A/C	Ribeiro et al., 2018	Ears per Plant
PHM174.13	1	294904503	B73 RefGen_v2	G/A	Ribeiro et al., 2018	Ears per Plant; Days to silking
PZA02094.9	1	15725672	B73 RefGen_v2	A/T	Almeida et al., 2014	Ears per Plant
PZA03240.1	1	90772226	B73 RefGen_v2	A/G	Almeida et al., 2014	Ears per Plant
PZA03240.2	1	90772275	B73 RefGen_v2	C/G	Almeida et al., 2014	Ears per Plant
PZA02359.10	1	293907804	B73 RefGen_v2	G/A	Almeida et al., 2014	Ears per Plant
PHM9807.9	1	294311411	B73 RefGen_v2	G/C	Almeida et al., 2014	Ears per Plant
PZA03183.5	1	46065084	B73 RefGen_v2	G/A	Almeida et al., 2014	Ears per Plant/Chlorophyll content
PZA03189.4	1	64261105	B73 RefGen_v2	C/A	Almeida et al., 2014	Ears per Plant/Chlorophyll content
PZB00008.1	1	268371949	B73 RefGen_v2	G/A	Almeida et al., 2014	Ears per Plant/Plant height
PZE-101222338	1	273450920	B73 RefGen_v2	A/G	Bouchet et al 2017	Grain yield
PZE0165109124	1	65087499	B73 RefGen_V2	T/G	Nair et al 2015	Grain yield
PZE-101084671	1	73349070	B73 RefGen_v2	A/G	Nair et al 2015	Grain yield
SYN35629	1	81106413	B73 RefGen_v2	A/C	Nair et al 2015	Grain yield
PZE-101090728	1	82577010	B73 RefGen_v2	C/T	Nair et al 2015	Grain yield
SYN25468	1	83783583	B73 RefGen_v2	G/T	Nair et al 2015	Grain yield
PZE-101093951	1	87301345	B73 RefGen_v2	A/G	Nair et al 2015	Grain yield
PZE0186065237	1	87301459	B73 RefGen_V2	T/C	Nair et al 2015	Grain yield
PZE0186365075	1	87601397	B73 RefGen_V2	A/C	Nair et al 2015	Grain yield
PZA00944.1	1	88998955	B73 RefGen_v2	A/G	Nair et al 2015	Grain yield
PZE-101098295	1	89384498	B73 RefGen_v2	A/G	Nair et al 2015	Grain yield
PZE-101098418	1	89771326	B73 RefGen_v2	C/T	Nair et al 2015	Grain yield
PZE-101094951	1	92871751	B73 RefGen_v2	A/C	Nair et al 2015	Grain yield
PZE-101102819	1	102090147	B73 RefGen_v2	A/G	Nair et al 2015	Grain yield
PZE-101107639	1	113004922	B73 RefGen_v2	C/G	Nair et al 2015	Grain yield
PZE01141571676	1	142730137	B73 RefGen_V2	G/A	Nair et al 2015	Grain yield
PZA02487.1	1	22601426	B73 RefGen_v2	G/A	Ribeiro et al., 2018	Grain yield
PHM4752.14	1	298874066	B73 RefGen_v2	G/A	Ribeiro et al., 2018	Grain yield
csu1171.2	1	14578606	B73 RefGen_v2	G/A	Ribeiro et al., 2018	Grain yield/Days to Silking
PZA03200.2	1	148694799	B73 RefGen_v2	A/G	Almeida et al., 2013; Almeida et al., 2014; Ribeiro et al., 2018	Grain yield/Leaf senescence/Ear height; Ears per plant
PHM13619.5	1	22281738	B73 RefGen_v2	C/A	Almeida et al., 2014	Plant Height
PHM12323.17	1	53357797	B73 RefGen_v2	G/C	Almeida et al., 2014	Plant Height
PZA02655.9	1	217504762	B73 RefGen_v2	G/C	Almeida et al., 2014	Plant Height
PHM297.18	1	239313773	B73 RefGen_v2	T/A	Almeida et al., 2014	Plant Height
PZA00623.3	1	293632633	B73 RefGen_v2	G/A	Almeida et al., 2014	Plant Height
PZA01588.1	1	258495441	B73 RefGen_v2	G/A	Almeida et al., 2014	Plant Height/Ears per plabt
CSU1138.4	1	119018556	B73 RefGen_V2	A/G	Almeida et al., 2014; Ribeiro et al., 2018	Plant Height
PHM5306.16	1	76053490	B73 RefGen_v2	A/G	Ribeiro et al., 2018	Plant Height
PHM13094.8	1	8368054	B73 RefGen_v2	G/A	Ribeiro et al., 2018	Plant height/Grain yield/Days to silking
PHM14475.7	1	256245118	B73 RefGen_v2	G/A	Almeida et al., 2014	Leaf senescence
PZA03521.1	1	10068726	B73 RefGen_v2	T/A	Almeida et al., 2014	Leaf senescence
PZA02195.1	1	39288623	B73 RefGen_v2	C/A	Almeida et al., 2014	Leaf senescence
PZA00381.4	1	237639037	B73 RefGen_v2	C/G	Almeida et al., 2014	Leaf senescence
PHM3034.3	1	255553191	B73 RefGen_v2	A/G	Almeida et al., 2014	Leaf senescence
PZA01921.19	1	261313982	B73 RefGen_v2	G/A	Almeida et al., 2014	Leaf senescence
PZA03020.8	1	282044048	B73 RefGen_v2	A/T	Almeida et al., 2014	Leaf senescence
PZB02058.1	1	28421841	B73 RefGen_v2	C/T	Almeida et al., 2014; Ribeiro et al., 2018	Leaf senescence
PZA02741.1	1	161072169	B73 RefGen_v2	T/C	Almeida et al., 2014	Stay-green characteristics
PHM5622.21	1	183831657	B73 RefGen_v2	A/T	Almeida et al., 2014	Stay-green characteristics
PZA02376.1	1	44506999	B73 RefGen_v2	C/G	Almeida et al., 2014	stay-green characteristics/Ears per plant
PZA01280.2	2	149428645	B73 RefGen_v2	G/A	Almeida et al., 2014	Anthesis-silking interval
PZA01232.1	2	155868024	B73 RefGen_v2	G/A	Almeida et al., 2014	Anthesis-silking interval
PZA02939.10	2	157152464	B73 RefGen_v2	A/G	Almeida et al., 2014	Anthesis-silking interval
PZA01336.1	2	31394426	B73 RefGen_v2	G/A	Almeida et al., 2014	Anthesis-silking interval/Chlorophyll content
PHM6111.5	2	21990814	B73 RefGen_v2	G/A	Almeida et al., 2014	Anthesis-silking interval/Ears per plant/Ear height
PZA01885.2	2	206881202	B73 RefGen_v2	G/A	Almeida et al., 2014	Chlorophyll content
PZA00365.2	2	1221385	B73 RefGen_v2	G/C	Almeida et al., 2014	Chlorophyll content
PZA02012.7	2	218280503	B73 RefGen_v2	G/A	Almeida et al., 2014	Ears per Plant
PZA01374.1	2	28316042	B73 RefGen_v2	G/A	Almeida et al., 2014	Ear Height
PZA02264.5	2	3167435	B73 RefGen_v2	G/A	Almeida et al., 2014	Ears per Plant/Plant height
PZA01352.5	2	226450168	B73 RefGen_v2	A/G	Almeida et al., 2014	Ears per Plant/Plant height/Chlorophyll content
PZE-102166510	2	210854720	B73 RefGen_v2	C/T	Bouchet et al 2017	Grain yield
PHM4425.25	2	19837545	B73 RefGen_v2	A/G	Ribeiro et al., 2018	Grain yield/Anthesis-silking interval
PHM13648.11	2	144527713	B73 RefGen_v2	G/A	Ribeiro et al., 2018	Grain yield/Anthesis-silking interval
PZA02450.1	2	47575949	B73 RefGen_v2	C/A	Almeida et al., 2014	Plant Height
PZA03692.1	2	166659759	B73 RefGen_v2	A/G	Almeida et al., 2014	Plant Height
PZA02890.4	2	187225134	B73 RefGen_v2	A/C	Almeida et al., 2014	Plant Height
PHM7953.11	2	195938696	B73 RefGen_v2	G/A	Almeida et al., 2014	Leaf senescence
PZA02731.1	2	197109533	B73 RefGen_v2	A/G	Almeida et al., 2014	Leaf senescence
PHM16125.47	2	199411414	B73 RefGen_v2	C/G	Almeida et al., 2014	Leaf senescence
PHM15449.10	3	125077922	B73 RefGen_v2	A/G	Almeida et al., 2014	Anthesis-silking interval
PZA01154.1	3	216028207	B73 RefGen_v2	G/A	Almeida et al., 2014	Anthesis-silking interval
PHM2423.33	3	227682146	B73 RefGen_v2	C/A	Almeida et al., 2014	Anthesis-silking interval/Ears per plant
PZA01962.12	3	178229838	B73 RefGen_v2	T/A	Almeida et al., 2014	Chlorophyll content
PZA03458.1	3	203318583	B73 RefGen_v2	G/A	Almeida et al., 2014	Chlorophyll content
PZA00279.2	3	52804070	B73 RefGen_v2	G/A	Almeida et al., 2014	Chlorophyll content
PZD00027.2	3	169757334	B73 RefGen_v2	A/G	Almeida et al., 2014	Ears per Plant
PHM5502.31	3	67284067	B73 RefGen_v2	A/G	Almeida et al., 2014	Ear Height
PHM13742.5	3	215181142	B73 RefGen_v2	A/G	Almeida et al., 2014	Ears per Plant
PZA01688.3	3	223670423	B73 RefGen_v2	G/A	Almeida et al., 2014	Ears per Plant
PZA03309.1	3	18638996	B73 RefGen_v2	G/T	Bouchet et al 2017	Grain yield
PZE-103086306	3	142902403	B73 RefGen_v2	C/T	Bouchet et al 2017	Grain yield
PZE-103107953	3	168961638	B73 RefGen_v2		Bouchet et al 2017	Grain yield
PZE-103134582	3	190163833	B73 RefGen_v2	C/G	Bouchet et al 2017	Grain yield
PHM2343.25	3	27981649	B73 RefGen_v2	G/A	Almeida et al., 2014	Plant Height
PZA02255.2	3	33226251	B73 RefGen_v2	A/C	Almeida et al., 2014	Plant Height
PZA01447.1	3	53549251	B73 RefGen_v2	G/A	Almeida et al., 2014	Plant Height
PZA00920.1	3	142821031	B73 RefGen_v2	A/G	Almeida et al., 2014	Plant Height/Leaf senescence
PZA00186.4	3	165800340	B73 RefGen_v2	G/A	Almeida et al., 2014	Plant Height
PZA02299.16	3	103386170	B73 RefGen_v2	G/A	Almeida et al., 2014	Leaf senescence
PZA03527.1	3	5748473	B73 RefGen_v2	A/G	Almeida et al., 2014	Leaf senescence
PZA00210.9	3	29693390	B73 RefGen_v2	G/A	Almeida et al., 2014	Leaf senescence
PZA02212.1	3	174550726	B73 RefGen_v2	A/G	Almeida et al., 2014	Stay-green characteristics
PZA02027.1	4	132975471	B73 RefGen_v2	G/A	Almeida et al., 2014	Anthesis-silking interval/Plant height
fea2.3	4	133663063	B73 RefGen_v2	C/T	Almeida et al., 2014	Anthesis-silking interval/Leaf senescence
PZA00436.7	4	6401332	B73 RefGen_v2	G/A	Almeida et al., 2014	Chlorophyll content
PZA03385.1	4	37067373	B73 RefGen_v2	C/A	Almeida et al., 2014	Chlorophyll content
PHM14717.2	4	40699977	B73 RefGen_v2	C/T	Almeida et al., 2014	Chlorophyll content
PHM2438.28	4	3548007	B73 RefGen_v2	A/G	Almeida et al., 2014	Chlorophyll content
PZA03205.1	4	202883367	B73 RefGen_v2	G/A	Almeida et al., 2014	Chlorophyll content
PZA01810.2	4	203767481	B73 RefGen_v2	G/A	Almeida et al., 2014	Chlorophyll content
PZA00453.2	4	166281188	B73 RefGen_v2	G/A	Almeida et al., 2014	Ear Height
PZA01477.3	4	172301064	B73 RefGen_v2	T/C	Almeida et al., 2014	Ear Height
PZA03322.5	4	242019440	B73 RefGen_v2	G/C	Almeida et al., 2014	Ear Height
PZA01905.12	4	244087450	B73 RefGen_v2	G/A	Almeida et al., 2014	Ears per Plant/Chlorophyll content
SYN33200	4	695932	B73 RefGen_v2	C/T	Bouchet et al 2017	Grain yield
PZA03459.1	4	134292522	B73 RefGen_v2	A/G	Almeida et al., 2014	Plant Height
PZA02779.1	4	207114208	B73 RefGen_v2	A/G	Almeida et al., 2014	Plant Height
PHM5599.20	4	239237605	B73 RefGen_v2	G/A	Almeida et al., 2014	Plant Height
ZmSYNBREED_37842_379	4	6448544	B73 RefGen_v2	A/G	Morosini et al., 2017	Root Length under high soil nitrogen
PZA03231.1	4	104160525	B73 RefGen_v2	A/G	Almeida et al., 2014	Leaf senescence
PZA03409.1	4	128632208	B73 RefGen_v2	A/C	Almeida et al., 2014	Leaf senescence
PHM4310.112	4	244087971	B73 RefGen_v2	A/C	Almeida et al., 2014	Stay-green characteristics
PHM3963.33	4	5459125	B73 RefGen_v2	G/C	Ribeiro et al., 2018	Stay-green characteristics
PHM3587.6A	4	52098226	B73 RefGen_v2	C/T	Ribeiro et al., 2018	Stay-green characteristics
PHM3155.14	4	170467673	B73 RefGen_v2	A/G	Ribeiro et al., 2018	Stay-green characteristics
PZA00529.4	4	240769260	B73 RefGen_v2	G/A	Almeida et al., 2014	Stay-green characteristics/Ear height
PZA02209.2	5	180428220	B73 RefGen_v2	A/C	Almeida et al., 2014	Anthesis-silking interval
PHM3512.186	5	203434263	B73 RefGen_v2	A/G	Almeida et al., 2014	Anthesis-silking interval
PZA02207.1	5	49203492	B73 RefGen_v2	G/A	Almeida et al., 2014	Chlorophyll content
PZA03167.5	5	207603495	B73 RefGen_v2	A/G	Almeida et al., 2014	Chlorophyll content/Ear height
PHM13696.9	5	175367030	B73 RefGen_v2	A/G	Almeida et al., 2014	Chlorophyll content
PZA00980.1	5	204966179	B73 RefGen_v2		Almeida et al., 2014; Ribeiro et al., 2018	Chlorophyll content/Grain yield
PZA02408.2	5	180413515	B73 RefGen_v2	G/A	Almeida et al., 2014	Chlorophyll content
PZA00996.1	5	37788653	B73 RefGen_v2	A/G	Almeida et al., 2014	Ear Height
PZA01680.3	5	208901002	B73 RefGen_v2	G/A	Almeida et al., 2014	Ears per Plant
PZA02099.3	5	206329295	B73 RefGen_v2	A/G	Almeida et al., 2014	Ears per Plant/Anthesis-silking interval
PZA00963.3	5	207273479	B73 RefGen_v2	G/A	Almeida et al., 2014	Ears per Plant/Chlorophyll content
PHM16854.3	5	34587029	B73 RefGen_v2	C/G	ribeiro et al., 2018	Grain yield
PZA02068.1	5	204198466	B73 RefGen_v2	A/G	Ribeiro et al., 2018	Grain yield
PHM563.9	5	204993639	B73 RefGen_v2	A/G	Ribeiro et al., 2018	Grain yield
ZmSYNBREED_50796_938	5	200437599	B73 RefGen_v2	C/G	Morosini et al., 2017	Low soil nitrogen tolerance Index
PZA03340.2	5	20201009	B73 RefGen_v2	G/C	Almeida et al., 2014	Plant Height
ae1.7	5	167873309	B73 RefGen_v2	G/A	Almeida et al., 2014; Ribeiro et al., 2018	Plant Height; Stay-green characteristics/Grain yield
PZA02015.11	5	207464707	B73 RefGen_v2	A/G	Almeida et al., 2014	Leaf senescence
PHM565.31	5	24242002	B73 RefGen_v2	A/G	Almeida et al., 2014	Leaf senescence/Chlorophyll content
PHM13696.11	5	175367080	B73 RefGen_v2	G/A	Almeida et al., 2014	Stay-green characteristics
PZA01142.4	5	199697937	B73 RefGen_v2	G/A	Almeida et al., 2014	Stay-green characteristics
PZA01327.1	5	15056528	B73 RefGen_v2	A/G	Ribeiro et al., 2018	stay-green characteristics/Grain yield
PZA00214.1	6	91704092	B73 RefGen_v2	T/A	Almeida et al., 2014	Anthesis-silking interval
PHM15251.5	6	153123234	B73 RefGen_v2	A/T	Ribeiro et al., 2018	Anthesis-silking interval
PHM15961.13	6	9561803	B73 RefGen_v2	G/C	Almeida et al., 2014	Anthesis-silking interval/Leaf senescence
PHM4503.25	6	161137975	B73 RefGen_v2	C/A	Almeida et al., 2014	Chlorophyll content
PHM2108.61	6	161663814	B73 RefGen_v2	G/C	Almeida et al., 2014	Chlorophyll content
PHM4468.13	6	167527305	B73 RefGen_v2	A/G	Almeida et al., 2014	Chlorophyll content
PZB00414.2	6	131405570	B73 RefGen_v2	G/A	Almeida et al., 2014; Ribeiro et al., 2018	Ear Height/Plant height;Grain yield/stay-green characterristics
PZB01222.1	6	164419435	B73 RefGen_v2	C/G	Almeida et al., 2014	Ears per Plant/Leaf senescence
PHM15251.3	6	152973272	B73 RefGen_v2	A/G	Ribeiro et al., 2018	Grain yield
PZA02478.7	6	141111650	B73 RefGen_v2	A/G	Almeida et al., 2014	Plant Height
PHM5529.4	6	167120845	B73 RefGen_v2	C/A	Ribeiro et al., 2018	Plant Height/Days to silking
PHM12904.7	6	88691499	B73 RefGen_v2	G/A	Ribeiro et al., 2018	Plant Height/Days to silking
PZA02247.1	6	146544292	B73 RefGen_v2	A/G	Ribeiro et al., 2018	Stay-green characteristics
PZA01542.1	7	129793873	B73 RefGen_v2	G/A	Almeida et al., 2014	Anthesis-silking interval/Ears per plant/Chlorophyll content/Ear height
PZA01909.2	7	6437808	B73 RefGen_v2	A/G	Almeida et al., 2014	Anthesis-silking interval/Leaf senescence/Chlorophyll content/Ear height/Plant height
PZA01210.1	7	75099046	B73 RefGen_v2	G/A	Almeida et al., 2014	Chlorophyll content
PHM4135.15	7	6437899	B73 RefGen_v2	G/C	Almeida et al., 2014	Ear Height
PZA03166.1	7	137632654	B73 RefGen_v2	A/G	Almeida et al., 2014	Ears per Plant
PZA00405.6	7	138551416	B73 RefGen_v2	G/C	Almeida et al., 2014	Ears per Plant
PHM1912.20	7	155970323	B73 RefGen_v2	G/A	Almeida et al., 2014	Ears per Plant
PHM10225.15	7	162173638	B73 RefGen_v2	C/G	Almeida et al., 2014	Ears per Plant
PZE-107063100	7	120203200	B73 RefGen_v2	C/T	Bouchet et al 2017	Grain yield
PZE-107043343	7	85581217	B73 RefGen_v2	G/T	Morosini et al., 2017	Low soil nitrogen tolerance Index
ZmSYNBREED_59193_698	7	98855426	B73 RefGen_v2	C/T	Morosini et al., 2017	Low soil nitrogen tolerance Index
PZA02018.1	7	86401923	B73 RefGen_v2	C/A	Almeida et al., 2014	Plant Height
PZA03583.1	7	128404558	B73 RefGen_v2	G/A	Almeida et al., 2014	Plant Height
PZA00795.1	7	159417489	B73 RefGen_v2	G/A	Almeida et al., 2014	Plant Height
PZA02373.1	7	161618509	B73 RefGen_v2	A/G	Almeida et al., 2014	Plant Height
ZmSYNBREED_61346_186	7	172363612	B73 RefGen_v2	A/C	Morosini et al., 2017	Root Length under low soil nitrogen
PZA00418.2	7	71717601	B73 RefGen_v2	G/A	Almeida et al., 2014	Leaf senescence
PZA00717.15	8	68476189	B73 RefGen_v2	A/C	Almeida et al., 2014	Anthesis-silking interval
PHM4203.11	8	133529939	B73 RefGen_v2	C/A	Almeida et al., 2014	Chlorophyll content
PHM4757.14	8	151452567	B73 RefGen_v2	A/C	Almeida et al., 2014	Chlorophyll content
PZA01691.1	8	11620274	B73 RefGen_v2	A/G	Almeida et al., 2014	Chlorophyll content
PZA01857.1	8	156100505	B73 RefGen_v2	G/A	Almeida et al., 2014	Ears per Plant
PZE-108070380	8	123506141	B73 RefGen_v2	C/T	Bouchet et al 2017	Grain yield
SYN1000	8	162507079	B73 RefGen_v2		Bouchet et al 2017	Grain yield
PHM934.19	8	116786833	B73 RefGen_v2	G/A	Ribeiro et al., 2018	Grain yield
PHM15278.6	8	156724363	B73 RefGen_v2	A/C	Ribeiro et al., 2018	Grain yield
PHM4560.54	8	163565429	B73 RefGen_v2	G/A	Ribeiro et al., 2018	Grain yield
PZA01079.1A	8	14068718	B73 RefGen_v2	C/T	Ribeiro et al., 2018	grain yield; Stay-green characteristics
PHM2749.10	8	171703522	B73 RefGen_v2	G/A	Ribeiro et al., 2018	grain yield/Stay-green characteristics
PHM2350.17	8	23985819	B73 RefGen_v2	C/A	Almeida et al., 2013	Plant Height
PHM4552.6	8	67931578	B73 RefGen_v2	C/A	Almeida et al., 2014	Plant Height
ZmSYNBREED_63615_936	8	72174334	B73 RefGen_v2	A/C	Morosini et al., 2017	Root Length under high soil nitrogen
PZA00739.1	8	105796017	B73 RefGen_v2	G/A	Almeida et al., 2014	Leaf senescence
PZA01049.1	8	129044327	B73 RefGen_v2	G/A	Almeida et al., 2014	Leaf senescence
PHM12749.13	8	155071379	B73 RefGen_v2	G/C	Almeida et al., 2014	Leaf senescence
PHM1834.47	8	162446230	B73 RefGen_v2	C/G	Almeida et al., 2014	Leaf senescence
PZA01316.1	8	164369718	B73 RefGen_v2	A/G	Almeida et al., 2014	Leaf senescence
PZA02748.3	8	117273146	B73 RefGen_v2	G/A	Ribeiro et al., 2018	Stay-green characteristics
PZB01899.1	9	98502843	B73 RefGen_v2	G/A	Almeida et al., 2013	Anthesis-silking interval
PZA00947.1	9	96885738	B73 RefGen_v2	C/A	Almeida et al., 2014	Anthesis-silking interval/Ear height
PZA00323.3	9	142499873	B73 RefGen_v2	A/G	Almeida et al., 2014	Anthesis-silking interval/Leaf senescence
PZA03416.7	9	16980092	B73 RefGen_v2	G/A	Almeida et al., 2014	Ear Height
PZA01791.2	9	77467426	B73 RefGen_v2	T/C	Almeida et al., 2014	Ear Height
PZA01062.1	9	88057320	B73 RefGen_v2	C/A	Almeida et al., 2014	Ears per Plant
PZB01110.6	9	24028336	B73 RefGen_v2	A/G	Almeida et al., 2014	Ears per Plant/Chlorophyll content/Plant height
PZE-109038470	9	57186011	B73 RefGen_v2	A/C	Bouchet et al 2017	Grain yield
PHM11946.19	9	9886093	B73 RefGen_v2	G/A	Ribeiro et al., 2018	Grain yield
PHM13183.12	9	104710976	B73 RefGen_v2	A/G	Ribeiro et al., 2018	Grain yield
ZHD1.1	9	22042681	B73 RefGen_v2	A/G	Almeida et al., 2014	Leaf senescence
PZA01999.3	9	23217376	B73 RefGen_v2	G/C	Almeida et al., 2014	Leaf senescence
PHM5435.25	10	144239494	B73 RefGen_v2	G/A	Almeida et al., 2014	Anthesis-silking interval
PHM5740.9	10	8773358	B73 RefGen_v2	G/A	Almeida et al., 2014	Anthesis-silking interval/Ears per plant/Ear height
PZA03605.1	10	141830532	B73 RefGen_v2	A/G	Almeida et al., 2014	Anthesis-silking interval/Leaf senescence
PZA01001.2	10	146538889	B73 RefGen_v2	A/G	Almeida et al., 2014	Anthesis-silking interval/Leaf senescence/Chlorophyll content
PZA01456.2	10	135928293	B73 RefGen_v2	G/A	Almeida et al., 2014	Chlorophyll content
PHM1752.36	10	9746552	B73 RefGen_v2	A/G	Ribeiro et al., 2018	Ears per Plant
PZA02398.2	10	99471436	B73 RefGen_v2	G/A	Almeida et al., 2014	Ear Height
PZA02320.1	10	132256848	B73 RefGen_v2	C/A	Almeida et al., 2014	Ear Height
PHM15868.56	10	137132183	B73 RefGen_v2	A/G	Almeida et al., 2014	Ear Height
PZE-110015402	10	15004433	B73 RefGen_v2	C/T	Bouchet et al 2017	Grain yield
PZA01292.1A	10	109804242	B73 RefGen_v2	C/T	Ribeiro et al., 2018	Grain yield
PZB01301.5	10	9748559	B73 RefGen_v2	G/A	Ribeiro et al., 2018	Grain yield
PZA00444.1	10	106780357	B73 RefGen_v2	A/C	Ribeiro et al., 2018	Grain yield
ZmSYNBREED_23494_898	10	148504575	B73 RefGen_v2	C/G	Morosini et al., 2017	Low soil nitrogen tolerance Index
PZA00866.2	10	124203565	B73 RefGen_v2	G/A	Ribeiro et al., 2018	Plant Height
PZA02527.2	10	148488692	B73 RefGen_v2	C/G	Almeida et al., 2014	Plant Height/Ear height
PZA00048.1	10	98582149	B73 RefGen_v2	A/G	Almeida et al., 2014	Leaf senescence/Ear height
PZA01919.2	10	111260278	B73 RefGen_v2	G/C	Almeida et al., 2014	Stay-green characteristics
PZA03607.1	10	141828531	B73 RefGen_v2	A/G	Almeida et al., 2014	Stay-green characteristics
PHM15331.16	10	10432605	B73 RefGen_v2	G/A	Ribeiro et al., 2018	Stay-green characteristics
PHM4066.11	10	41187565	B73 RefGen_v2	A/G	Ribeiro et al., 2018	stay-green characteristics/Ears per plant
PZA01292.1B	10	109823407	Zea_mays.AGPv3.21		Almeida et al., 2013	Grain yield
