# Supplementary material for: SeqSNP-based genic markers reveal genetic architecture and candidate genes for low nitrogen tolerance in tropical maize inbred lines
Source: Front Plant Sci. 2025 May 30;16:1558741. doi: 10.3389/fpls.2025.1558741 (PMC12163039; doi:10.3389/fpls.2025.1558741)
Supplement: Supplementary file 2 [file Table2.xlsx]

## Sheet: Sheet1
Supplementary Table 2: Means of Agronomic traits of 150 inbred lines Under low and High Nitrogen environments
ENTRY	Anthesis-Silking Interval (Low Nitrogen)	Ear Aspect (Low Nitrogen)	Number of Ears Per Plant (Low Nitrogen)	Plant Aspect (Low Nitrogen)	Stay-green Characteristics (Low Nitrogen)	Grain Yield (Low Nitrogen)	Low Nitrogen Tolerance Index (LNTI)	Low Nitrogen Base Index (LNBI)	Anthesis-Silking Interval (High Nitrogen)	Ear Aspect (High Nitrogen)	Plant Aspect (High Nitrogen)	Stay-green Characteristics (High Nitrogen)	Grain Yield (High Nitrogen)
TZEEIORQ1	3.181	5.252	0.5457	4.397	5.152	577.1	7.14401	0.942914	2.53	4.372	3.42	4.067	621.5
TZEEIORQ10	2.853	4.892	0.5885	4.369	4.751	449.8	49.4891	1.2939	1.79	4.018	3.257	4.399	890.5
TZEEIORQ12A	3.149	6.978	0.494	5.208	5.049	318.2	30.6149	-3.10703	2.748	6.002	3.751	4.445	458.6
TZEEIORQ13A	3.603	7.17	0.4385	5.311	5.025	202.2	47.8463	-4.60727	2.3	6.125	4.947	4.429	387.7
TZEEIORQ16	3.18	6.615	0.5773	5.089	5.889	336.6	58.0822	-5.21371	2.467	5.185	3.314	4.562	803
TZEEIORQ2	3.131	6.483	0.5679	4.601	5.646	652.6	44.8585	-1.38083	2.167	6.051	2.948	3.826	1183.5
TZEEIORQ20A	2.814	4.989	0.6547	4.506	5.374	786.7	29.0686	2.24909	1.929	4.987	3.218	4.169	1109.1
TZEEIORQ21A	3.278	4.941	0.5958	4.643	5.104	599	42.4038	0.996588	2.325	5.383	3.235	4.079	1040
TZEEIORQ22A	2.814	5.826	0.6077	4.706	6.216	688.2	20.1346	-1.23228	2.017	6.031	3.389	4.203	861.7
TZEEIORQ23A	3.116	6.49	0.5632	4.988	5.518	918.4	-59.4168	1.42337	2.359	6.034	3.98	4.174	576.1
TZEEIORQ25	2.954	4.902	0.6014	4.305	5.133	513.1	54.7171	0.704055	2.479	4.729	3.2	4.243	1133.1
TZEEIORQ3	2.711	6.421	0.6982	4.479	4.72	1095.7	-11.1032	4.19752	2.392	5.677	3.004	3.707	986.2
TZEEIORQ34	3.167	6.358	0.6061	4.672	4.79	709.7	-7.25404	0.750968	2.092	5.931	3.711	4.121	661.7
TZEEIORQ38A	2.62	5.638	0.4784	4.389	5.4	568.3	44.8092	1.45643	2.088	4.875	3.433	4.29	1029.7
TZEEIORQ39B	3.486	5.853	0.4824	4.864	4.69	735.7	22.0574	2.70129	1.874	3.668	3.367	3.897	943.9
TZEEIORQ4	2.909	3.312	0.6813	4.191	5.181	613	50.3764	1.82416	2.132	3.212	2.857	3.545	1235.3
TZEEIORQ40A	3.197	6.809	0.5031	4.404	4.713	495.6	41.5635	-0.662197	2.366	6.141	3.696	3.953	848.1
TZEEIORQ42A	3.024	5.975	0.6292	4.622	5.093	685.6	26.9083	0.415926	2.197	5.498	3.542	4.183	938
TZEEIORQ46	2.684	6.731	0.6693	4.156	3.543	558.5	48.7568	0.484934	1.981	5.683	3.391	3.759	1089.9
TZEEIORQ47A	3.001	4.327	0.6163	4.305	4.354	507.3	59.3086	2.96395	2.445	4.907	3.224	3.834	1246.7
TZEEIORQ48	2.532	6.011	0.5397	4.505	4.606	474.7	38.7168	1.31092	2.01	5.935	3.425	4.273	774.6
TZEEIORQ5	2.514	6.471	0.7233	4.509	5.353	835.6	36.5239	0.40045	1.963	6.051	3.354	4.373	1316.4
TZEEIORQ50	3.026	6.974	0.5676	4.908	4.908	538.9	39.4698	-1.31993	2.214	6.123	3.564	4.221	890.3
TZEEIORQ50B	3.404	6.652	0.4643	4.927	4.731	651.5	42.8459	1.01514	1.913	6.002	3.396	4.345	1139.9
TZEEIORQ51	4.175	5.919	0.4763	4.887	5.462	380.9	54.0586	-3.52241	2.462	4.673	3.312	4.435	829.1
TZEEIORQ52A	2.984	6.226	0.5635	4.675	4.825	471.7	42.9625	-0.558574	2.198	6.003	3.483	4.306	827
TZEEIORQ53B	2.953	6.019	0.5523	4.159	4.643	371.8	63.9764	-0.605517	1.891	5.623	2.979	4.04	1032.1
TZEEIORQ55A	2.658	6.778	0.701	4.749	4.024	675.3	20.5436	1.4025	2.152	6.002	3.634	4.216	849.9
TZEEIORQ57A	2.694	5.771	0.5976	4.196	5.003	605.4	20.1214	1.08488	2.39	5.175	3.401	4.489	757.9
TZEEIORQ58	3.213	6.451	0.4897	4.461	4.97	697.5	53.4441	1.26576	2.395	6.123	2.964	4.048	1498.2
TZEEIORQ59	2.862	5.9	0.5208	4.75	5.278	573.6	31.1735	0.520305	2.317	5.475	3.593	4.148	833.4
TZEEIORQ60	3.09	6.336	0.5867	4.684	4.557	664.6	12.9991	1.22372	2.207	6.031	3.28	4.193	763.9
TZEEIORQ61A	2.951	5.605	0.5387	4.431	4.835	518.5	43.2837	1.07113	2.145	6.043	3.624	3.808	914.2
TZEEIORQ62B	3.459	6.923	0.5439	4.411	5.402	870.6	-12.104	0.217071	2.204	6.021	3.438	3.813	776.6
TZEEIORQ63A	2.045	6.391	0.6491	4.589	4.354	850.8	12.4961	4.48064	2.243	6.031	3.381	3.884	972.3
TZEEIORQ66	3.427	5.629	0.4978	4.477	4.919	410.8	45.4883	-0.542898	2.248	4.689	3.586	4.177	753.6
TZEEIORQ67	4.744	6.983	0.3533	6.448	6.282	241.3	54.2038	-7.85048	2.444	6.072	3.535	4.382	526.9
TZEEIORQ68	3.871	5.427	0.5027	4.727	5.123	313.3	56.2308	-2.4338	2.192	5.012	3.415	3.758	715.8
TZEEIORQ6A	2.302	5.344	0.6896	4.516	5.196	498.4	40.9968	-0.00650906	2.337	4.603	3.03	3.936	844.7
TZEEIORQ70A	3.211	6.007	0.528	4.346	5.07	630.9	0.0475285	0.666256	2.305	5.517	3.76	4.156	631.2
TZEEIORQ71	3.664	4.734	0.6695	4.59	5.263	399	70.0944	-2.36579	1.991	3.821	3.043	4.042	1334.2
TZEEIORQ72A	2.601	5.94	0.6162	4.556	5.026	701.7	31.3136	1.64393	1.998	6.034	3.245	4.452	1021.6
TZEEIORQ73A	2.478	5.009	0.691	4.446	5.368	1216	16.8035	6.4004	1.808	5.374	3.176	3.702	1461.6
TZEEIORQ74	2.679	6.819	0.5887	4.532	4.238	509.8	14.5348	0.50161	2.52	6.021	3.408	4.323	596.5
TZEEIORQ75	2.811	5.67	0.7205	4.644	4.727	616.2	28.9683	0.425976	2.291	4.482	3.609	4.06	867.5
TZEEIORQ76	3.034	6.291	0.4799	4.746	4.98	563.3	38.4304	0.653926	2.191	5.05	3.362	4.123	914.9
TZEEIORQ7A	3.109	6.358	0.5195	4.404	4.795	677.2	47.7872	1.46467	2.165	5.867	3.304	3.747	1297
TZEEIORQ8A	2.8	5.825	0.6252	4.964	5.07	774.9	-24.863	1.94378	2.42	6.051	3.653	4.278	620.6
TZEEIORQ9A	2.199	4.765	0.5685	4.676	4.761	777.9	-0.751198	5.84556	2.1	4.824	3.245	4.117	772.1
TZEEQI103	3.217	6.012	0.426	4.703	5.044	825.9	15.509	3.59421	2.094	5.742	3.529	4.097	977.5
TZEEQI104	3.601	6.678	0.4898	4.581	4.944	385.6	51.8962	-2.56671	1.93	5.216	3.19	3.602	801.6
TZEEQI107	2.754	6.024	0.5746	4.59	5.201	808.1	29.7182	2.29302	2.014	6.114	3.6	4.036	1149.8
TZEEQI108	2.623	6.246	0.7661	4.389	4.469	323.2	10.6442	-2.69769	1.925	5.157	3.229	2.534	361.7
TZEEQI110	2.45	6.191	0.5327	4.584	5.109	561.1	51.1747	0.954081	2.076	5.361	3.318	4.051	1149.2
TZEEQI114	3.227	6.411	0.5748	4.389	4.775	481.9	-17.8528	-1.16773	2.465	6.011	3.51	4.004	408.9
TZEEQI116	3.698	6.237	0.5743	4.67	5.242	789.4	-2.93389	0.0693066	2.289	6.043	3.171	4.101	766.9
TZEEQI121	3.029	6.343	0.5186	4.621	5.151	641.2	28.4694	0.51601	2.225	6.125	3.634	4.329	896.4
TZEEQI124	3.537	6.047	0.59	4.355	4.636	881.7	-10.5857	2.65227	2.18	5.514	3.422	4.229	797.3
TZEEQI13	2.928	6.279	0.5828	4.471	4.66	920.8	5.58802	3.76988	2.001	5.586	3.11	3.842	975.3
TZEEQI131	2.821	6.936	0.5466	5.048	5.95	670.6	-95.6814	-1.77115	1.947	6.141	3.678	4.342	342.7
TZEEQI14	2.673	5.723	0.5369	5.101	5.344	973.3	2.67973	4.48112	2.163	6.031	3.621	4.197	1000.1
TZEEQI147	3.65	6.565	0.525	4.805	5.138	491.8	46.9357	-2.31314	2.122	6.116	3.236	4.015	926.8
TZEEQI149	2.759	5.366	0.5568	4.163	5.494	768.3	13.6742	2.40893	2.362	6.034	3.693	4.054	890
TZEEQI15	4.8	6.862	0.4381	4.436	4.901	439.4	4.56125	-3.79241	2.329	6.141	3.408	3.896	460.4
TZEEQI151	2.966	6.511	0.514	4.65	4.929	642.7	-107.792	0.93788	2.774	6.128	3.344	4.15	309.3
TZEEQI155	1.904	6.077	0.6381	4.495	5.118	376	37.1763	-0.776447	2.29	5.134	3.624	3.969	598.5
TZEEQI16	3.808	7.348	0.4065	3.926	5.173	312.9	55.1848	-4.20255	2.431	5.581	3.616	4.611	698.2
TZEEQI18	3.688	6.743	0.496	4.657	5.277	677.6	33.0898	-0.919587	2.25	6.011	3.365	3.851	1012.7
TZEEQI180	3.672	6.343	0.4431	4.849	5.391	264	46.9027	-3.82144	2.505	5.888	3.25	4.042	497.2
TZEEQI185	3.675	5.89	0.5552	4.276	4.64	480.4	66.2047	-0.70678	2.309	5.154	3.124	3.932	1421.5
TZEEQI189	3.126	7.035	0.4846	4.741	5.056	902.4	-33.2939	2.33075	2.701	6.043	3.936	3.969	677
TZEEQI192	3.087	5.872	0.4208	4.811	5.176	386.9	44.8074	-0.266307	2.275	4.055	3.161	4.202	701
TZEEQI22	3.39	6.998	0.4733	4.928	5.298	296.7	45.3792	-4.08751	2.614	5.774	3.175	3.877	543.2
TZEEQI30	2.909	7.038	0.634	4.623	4.27	233.6	40.4082	-3.32268	1.311	6.125	2.908	4.319	392
TZEEQI32	3.692	7.224	0.6828	4.499	5.063	299	17.2433	-6.63582	2.112	6.011	3.593	3.801	361.3
TZEEQI351	3.142	5.693	0.6356	5.126	5.857	496.8	-4.21649	-2.88595	2.292	5.503	3.228	4.329	476.7
TZEEQI352	2.743	6.097	0.5508	4.576	4.597	671.5	45.4774	2.5356	2.11	4.345	3.333	3.651	1231.6
TZEEQI353	3.338	6.233	0.473	4.793	7.172	383.4	54.8197	-4.36399	2.136	6.051	3.562	4.256	848.6
TZEEQI354	3.749	6.32	0.437	4.299	6.093	503.5	22.9415	-3.19987	1.967	6.123	3.668	4.051	653.4
TZEEQI356	2.484	6.152	0.5513	4.578	4.834	488.9	47.3905	0.694295	1.837	4.708	3.712	3.843	929.3
TZEEQI357	2.794	5.671	0.6243	4.578	4.464	337.2	-30.4954	-0.514726	2.089	6.021	3.696	4.062	258.4
TZEEQI358	2.566	5.471	0.5765	4.804	5.052	501.2	55.0049	0.897114	2.284	4.793	3.166	3.693	1113.9
TZEEQI359	3.604	6.932	0.592	5.095	5.296	217.9	59.7599	-6.35613	2.306	6.043	3.476	4.179	541.5
TZEEQI360	3.134	6.678	0.4664	5.198	5.676	760.8	-25.1316	0.34697	2.222	6.051	4.084	4.025	608
TZEEQI361	3.666	6.448	0.5927	4.817	4.755	457.5	50.7747	-2.36306	2.307	5.129	3.394	4.279	929.4
TZEEQI362	4.535	7.197	0.3241	4.95	5.861	384.8	22.0421	-5.22504	2.382	5.588	3.707	4.119	493.6
TZEEQI365	3.39	5.84	0.5619	4.674	4.92	455.9	45.7843	-1.05194	2.204	6.009	3.501	4.337	840.9
TZEEQI366	3.325	7.156	0.3319	5.128	4.504	159.9	69.1789	-2.20081	2.407	6.009	3.667	4.373	518.8
TZEEQI368	2.763	5.398	0.5592	4.504	5.388	420.5	10.589	-0.647281	2.286	4.607	3.306	4.107	470.3
TZEEQI369	4.808	4.654	0.5495	4.383	4.42	489.2	38.3569	-0.278998	2.369	3.721	2.982	4.065	793.6
TZEEQI370	3.335	6.318	0.559	4.804	5.546	378.2	62.9506	-3.71812	1.828	5.721	3.368	4.368	1020.8
TZEEQI371	2.431	5.228	0.5947	4.654	5.337	566	-12.5472	1.25879	1.921	4.983	3.383	3.993	502.9
TZEEQI372	1.968	4.746	0.731	4.327	4.578	694.2	12.0041	4.17787	1.968	4.231	3.083	4.19	788.9
TZEEQI373	3.672	6.496	0.4989	5.003	4.94	350.5	66.0566	-2.84054	2.466	6.002	3.149	4.021	1032.6
TZEEQI374	3.184	4.919	0.6599	4.099	4.868	584.3	41.164	0.896409	2.099	4.624	3.069	3.675	993.1
TZEEQI375	3.757	6.679	0.4798	4.16	4.535	423.5	40.6697	-1.4801	2.539	6.125	3.362	4.474	713.8
TZEEQI377	4.205	6.463	0.4058	4.687	4.436	284.2	58.8772	-2.23222	2.778	4.791	3.533	3.973	691.1
TZEEQI378	3.484	6.605	0.4679	4.649	4.982	419.5	32.2841	-1.79358	2.598	6.034	3.378	4.588	619.5
TZEEQI379	3.756	4.607	0.5427	4.024	4.672	570.9	3.95357	1.90338	2.341	3.629	3.205	3.728	594.4
TZEEQI380	3.053	5.96	0.584	5.019	5.125	660.7	-7.18689	0.567816	2.27	4.865	3.16	4.232	616.4
TZEEQI381	3.82	6.721	0.4485	4.948	5.915	387	39.8975	-4.70845	2.462	6.031	3.594	4.84	643.9
TZEEQI384	4.86	6.291	0.4753	4.952	4.479	451.4	41.4375	-2.42443	2.278	4.613	3.42	4.201	770.8
TZEEQI385	2.88	6.355	0.5264	4.83	4.795	384.3	55.3088	-0.907842	2.377	6.043	3.553	3.79	859.9
TZEEQI386	2.965	5.692	0.5245	4.526	4.267	434.8	27.1814	1.55617	2.29	6.034	3.314	3.85	597.1
TZEEQI387	5.906	5.748	0.439	4.666	4.711	313.5	48.7996	-3.12036	2.291	5.591	3.737	4.4	612.3
TZEEQI389	3.087	4.546	0.5559	4.342	4.743	690.1	12.6234	3.96788	2.303	5.335	3.185	4.371	789.8
TZEEQI390	2.999	6.039	0.5807	4.835	4.891	1260.8	-7.07431	6.64328	2.398	6.034	3.389	4.466	1177.5
TZEEQI391	3.173	6.09	0.4777	4.838	4.855	497.9	35.8872	0.396681	2.386	5.869	3.453	4.333	776.6
TZEEQI392	2.837	5.2	0.4975	4.634	5.002	556.3	37.6135	2.27506	2.372	5.99	3.489	4.078	891.7
TZEEQI393	3.236	6.388	0.5917	4.791	5.71	736.4	22.2797	-1.04915	2.456	5.936	3.803	4.309	947.5
TZEEQI394	2.83	5.809	0.5977	4.412	4.66	882.3	40.8765	4.10655	2.529	5.203	3.071	4.355	1492.3
TZEEQI395	2.604	4.646	0.5697	4.519	5.292	759.6	31.2393	3.95037	1.916	4.028	3.133	4.193	1104.7
TZEEQI396	2.694	6.241	0.6161	4.614	5.542	669	29.1163	-0.396898	2.102	6.002	3.491	4.711	943.8
TZEEQI397	2.865	4.943	0.4554	4.531	5.353	577.1	-4.30146	2.4615	2.286	6.011	3.352	4.434	553.3
TZEEQI398	3.357	5.828	0.4638	4.67	5.782	479.9	19.9232	-1.61681	2.29	4.616	3.506	4.254	599.3
TZEEQI399	1.987	5.218	0.5498	4.652	5.482	629.6	10.0443	2.7971	1.998	5.735	3.477	4.133	699.9
TZEEQI400	2.498	6.327	0.6282	4.369	4.574	909.6	20.5242	4.05759	2.189	5.811	3.302	4.576	1144.5
TZEEQI402	1.561	5.401	0.8774	4.232	4.26	747.3	24.6406	4.05042	2.222	5.775	3.398	4.114	816.857
TZEEQI403	3.955	4.998	0.9568	4.627	4.325	565.2	66.3812	-2.58191	2.246	3.749	2.673	3.629	1681.2
TZEEQI404	2.8	6.145	0.6437	4.56	5.189	770.2	34.2608	0.977415	2.473	6.009	3.051	4.293	1171.6
TZEEQI405	3.206	5.406	0.5413	4.329	4.929	934.8	18.5217	4.52026	2.083	5.149	3.228	4.51	1147.3
TZEEQI407	2.931	6.382	0.5556	4.607	5.15	676.8	23.1084	0.568088	2.203	6.034	3.282	4.363	880.2
TZEEQI408	2.876	6.098	0.577	4.219	4.955	864.6	21.0843	3.01266	2.231	6.009	3.165	4.067	1095.6
TZEEQI409	2.499	5.035	0.6663	4.232	4.633	697.8	39.6732	3.43018	1.898	3.213	3.214	3.959	1156.7
TZEEQI410	3.046	5.585	0.6048	4.543	5.2	430.2	46.1846	-1.39437	2.187	4.001	3.245	3.929	799.4
TZEEQI411	3.262	6.159	0.5727	4.493	5.531	626.4	38.4797	-1.18104	1.92	6.043	3.464	3.99	1018.2
TZEEQI412	2.923	6.174	0.5715	5.183	5.038	404.3	-10.0735	-1.5555	1.947	6.021	3.991	4.162	367.3
TZEEQI414	2.949	5.296	0.6837	4.353	5.142	633.6	2.32773	0.359037	2.335	4.989	3.47	4.142	648.7
TZEEQI46	3.018	4.853	0.6258	4.051	4.529	387.2	7.14628	0.576385	1.891	4.753	3.437	4.38	417
TZEEQI47	3.52	7.165	0.4946	4.428	4.421	440.7	-52.5441	-1.51339	2.694	5.916	3.513	4.311	288.9
TZEEQI48	2.751	5.914	0.643	4.743	5.389	583.3	28.1119	-0.763966	1.987	6.141	3.692	4.373	811.4
TZEEQI50	3.301	5.91	0.538	4.345	4.553	737	-115.813	2.66586	2.175	6.021	3.557	4.623	341.5
TZEEQI51	2.995	6.494	0.6289	4.649	4.901	308.7	8.31601	-3.3358	1.982	5.026	3.343	4.014	336.7
TZEEQI53	2.666	6.829	0.637	4.909	4.824	538.5	-21.5027	-1.03662	1.995	6.009	3.581	3.754	443.2
TZEEQI54	3.603	6.817	0.6869	4.815	4.989	272.9	71.8108	-6.01257	2.281	5.775	2.901	3.842	968.1
TZEEQI55	3.332	5.501	0.6209	4.428	4.621	424.5	45.2611	-0.717626	2.594	5.6	3.387	4.151	775.5
TZEEQI58	2.718	6.626	0.7384	4.696	4.702	319.4	7.84766	-3.66884	2.25	6.051	3.979	4.312	346.6
TZEEQI60	3.166	6.465	0.5014	4.379	4.589	847.2	38.87	3.42882	2.526	5.454	3.285	3.751	1385.9
TZEEQI65	3.141	6.813	0.6219	4.198	4.696	314.6	46.2957	-3.47011	2.271	6.123	3.529	4.163	585.8
TZEEQI68	2.666	6.824	0.5031	4.7	4.605	493.4	41.8023	0.466124	2.059	6.021	3.173	4.026	847.8
TZEEQI7	3.068	5.343	0.681	4.316	4.528	817.7	46.5381	3.17005	1.821	5.918	3.231	4.025	1529.5
TZEEQI77	2.253	5.89	0.6965	4.56	6.026	1349.2	-92.3856	5.23734	1.914	6.031	3.199	4.147	701.3
TZEEQI82	2.975	5.808	0.5759	4.763	5.152	443	17.5354	-1.05959	2.282	6.123	3.669	3.93	537.2
TZEEQI83	3.097	6.318	0.5897	4.166	5.002	501.2	36.5329	-1.28825	1.72	4.312	2.944	3.963	789.7
TZEEQI86	2.298	6.968	0.5715	4.461	4.182	151.2	56.1993	-2.04986	2.594	6.011	3.94	4.295	345.2
TZEEQI88	2.667	6.12	0.621	4.34	4.855	592.5	-0.713921	0.586833	2.274	6.011	3.635	3.894	588.3
TZEEQI89	3.606	5.948	0.5013	4.351	5.149	910.8	29.2033	2.75341	1.897	6.053	3.154	3.898	1286.5
TZEEQI90	2.719	6.638	0.5964	4.701	4.694	352.3	9.08387	-1.85265	1.994	5.885	3.26	3.768	387.5
TZEEQI92	3.348	6.38	0.2123	4.486	4.427	347.7	46.8917	0.993882	2.333	6.009	3.59	3.778	654.7
TZEEQI93	3.366	6.629	0.4832	4.251	4.733	669.7	15.8668	1.0772	2.716	6.051	3.475	3.875	796
